# Supplementary material for: Nociceptive interneurons control modular motor pathways to promote escape behavior in Drosophila
Source: eLife. 2018 Mar 12;7:e26016. doi: 10.7554/eLife.26016 (PMC5869015; doi:10.7554/eLife.26016)
Supplement: Figure 1—figure supplement 4—source data 1. — Genotypes, number of animals tested, graph data and statistical testing presented for 412-Gal4, 4051-Gal4 and off-target activation experiments. [file elife-26016-fig1-figsupp4-data1.xlsx]

## Sheet: Sheet1
Figure 1_Supp4B
	Genotype	# larvae rolling	total larvae	Statistical Test	P-Value
				Chi-squared with Bonferonni Correction in cases of multiple testing	<0.0001	Comparing 412-Gal4 30˚C dTrpA activation to 25˚C condition, UAS-dTrpA or 412-Gal4 alone
412>dTrpA 25˚C	UAS-dTrpA1/+ ;412-Gal4/+	0	26
UAS-dTrpA1/+	UAS-dTrpA1/+	0	33
412-Gal4/+	412-Gal4/+	0	28
412>dTrpA 30˚C	UAS-dTrpA1/+; 412-Gal4/+	42	48
Figure 1_Supp4C
	Genotype	# larvae rolling	total larvae	Statistical Test	P-Value
				Chi-squared	<0.0001	Comparing 4051>dTrpA activation vs 4051-Gal4 driver alone
4051-Gal4/+	4051-Gal4/+	0	30
4051>UAS-dTrpA	UAS-dTrpA/+; 4051-Gal4/+	24	30
Figure 1_Supp4D
	Genotype	# larvae rolling	total larvae	Statistical Test	P-Value
				Chi-squared	<0.0001	Comparing rolling in 412>UASReaChR animals raised with or without ATR
412>UAS-ReaChR (ATR-)	UAS-ReaChR/ 412-Gal4	0	32
412>UAS-ReaChR (ATR+)	UAS-ReaChR/ 412-Gal4	34	48
Figure 1_Supp4G
	Genotype	# larvae rolling	total larvae
UAS-dTrpA/+	UAS-dTrpA/+	0	49
R38H01> UAS-dTrpA	UAS-dTrpA/+; 38H01-Gal4/+	1	29
Trh> UAS-dTrpA	UAS-dTrpA/+; Trh-Gal4/+	0	30
