# Supplementary material for: Nociceptive interneurons control modular motor pathways to promote escape behavior in Drosophila
Source: eLife. 2018 Mar 12;7:e26016. doi: 10.7554/eLife.26016 (PMC5869015; doi:10.7554/eLife.26016)
Supplement: Figure 1—source data 1. — Genotypes, number of animals tested, graph data and statistical testing presented for thermogenetic activation experiments. [file elife-26016-fig1-data1.xlsx]

## Sheet: Sheet1
Figure 1G
	Genotype	# larvae rolling	total larvae	Statistical Test	P-Value
				Chi-squared	<0.0001	comparing no activation vs 412 VNC >UAS-dTrpA
No activation	tsh-LexA,8X-LexAopFLP; 412-Gal4/+	0	21
412>UAS-dTrpA	UAS- dTrpA1/+; 412-Gal4/+	28	28
412>UAS-dTRpA Brain	tsh-Gal80/UAS-dTrpA1; 412-Gal4/+	0	25
412>UAS-dTRpA VNC	tub>Gal80>;tsh- LexA,8X-LexAopFLP; UAS-dTrpA1/412-Gal4	16	30
Figure 1J
	Genotype	n #	% Time Bending Median	25% Percentile	75% Percentile	Statistical Test	P-Value
						One-way ANOVA with Tukey's multiple comparisons test; post-hoc T-test	<0.0001	comparing no activation to cIV or 412 VNC> dTrPA
No activation	tsh-LexA,8X-LexAopFLP; 412-Gal4/+	21	6.667	0	16.67
cIV>UAS-dTrpA	ppk1.9-Gal4/+; UAS-dTrpA1/+	28	65	40.83	92.5
412>UAS-dTrpA VNC	tub>Gal80>;tsh- LexA,8X-LexAopFLP; UAS-dTrpA1/412-Gal4	30	73.33	48.33	93.33
Figure 1K
	Genotype	n #	Mean % Time Bend-Crawling	Mean % Time Rolling	Mean %Time Bending Only
No activation	tsh-LexA,8X-LexAopFLP; 412-Gal4/+	21	2.381	0	7.46
cIV>UAS-dTrpA	ppk1.9-Gal4/+; UAS-dTrpA1/+	28	15.95	47.38	1.19
412>UAS-dTrpA VNC	tub>Gal80>;tsh- LexA,8X-LexAopFLP; UAS-dTrpA1/412-Gal4	30	32	10.89	25.11
Figure 1L
	Genotype	n #	% Time Bend-Crawling (Median, 25%, 75%)	%Time Rolling (Median, 25%, 75%)	%Time Bending Only (Median, 25%, 75%)	Statistical Test	P-Value
						Kruskal-Wallis with Dunn's Correction	<0.0001	comparing cIV to 412-VNC activation during rolling and bending only
No activation	tsh-LexA,8X-LexAopFLP; 412-Gal4/+	21	0,0,0	0,0,0	0,0,13.33
cIV>UAS-dTrpA	ppk1.9-Gal4/+; UAS-dTrpA1/+	28	11.67, 3.333, 19.17	45, 26.67, 75.83	0,0,0
412>UAS-dTrpA VNC	tub>Gal80>;tsh- LexA,8X-LexAopFLP; UAS-dTrpA1/412-Gal4	30	28.33,10.83, 54.17	3.333,0,20	20,0, 37.5
Figure 1M
	Genotype	n #	Median Bend-Bout Crawl (seconds)	25% Percentile	75% Percentile	Statistical Test	P-Value
						Mann-Whitney	<0.0001	Comparing cIV to 412-VNC activation
cIV>UAS-dTrpA	ppk1.9-Gal4/+; UAS-dTrpA1/+	28	2	1	3
412>UAS-dTrpA VNC	tub>Gal80>;tsh- LexA,8X-LexAopFLP; UAS-dTrpA1/412-Gal4	30	5	3.5	10.5
