# Supplementary material for: Nociceptive interneurons control modular motor pathways to promote escape behavior in Drosophila
Source: eLife. 2018 Mar 12;7:e26016. doi: 10.7554/eLife.26016 (PMC5869015; doi:10.7554/eLife.26016)
Supplement: Figure 2—source data 1. — Number of animals displaying bending, rolling, pausing, or crawling during optogenetic activation of ppk1.9-Gal4 or 412-Gal4 neurons across different levels of activation. [file elife-26016-fig2-data1.xlsx]

## Sheet: Sheet1
Figure 2
		Lowest						Low						Medium						High
	PPK1.9 Lowest						PPK1.9 Low						PPK1.9 Med						PPK1.9 High
	Pre-1s	1s	5s	10s			Pre-1s	1s	5s	10s			Pre-1s	1s	5s	10s			Pre-1s	1s	5s	10s
Bending	2	13	1	3		Bending	4	1	4	6		Bending	2	6	13	14		Bending	2	10	17	10
Rolling	0	5	0	0		Rolling	0	25	0	0		Rolling	0	13	0	0		Rolling	0	11	0	0
Pause	2	2	2	5		Pause	2	0	7	6		Pause	1	1	4	2		Pause	4	2	6	8
Crawling	20	4	21	16		Crawling	20	0	15	14		Crawling	17	0	3	4		Crawling	17	0	0	5
Total larvae	24	24	24	24		Total larvae	26	26	26	26		Total larvae	20	20	20	20		Total larvae	23	23	23	23
																		23
	412 Lowest						412 Low						412 Med						412 High
	Pre-1s	1s	5s	10s			Pre-1s	1s	5s	10s			Pre-1s	1s	5s	10s			Pre-1s	1s	5s	10s
Bending	5	7	4	3		Bending	4	11	20	26		Bending	4	15	23	10		Bending	4	7	10	7
Rolling	0	0	0	0		Rolling	0	0	0	0		Rolling	0	0	1	15		Rolling	0	0	14	23
Pause	1	1	2	3		Pause	1	14	10	4		Pause	1	8	2	1		Pause	3	23	6	0
Crawling	16	14	16	16		Crawling	25	5	0	0		Crawling	21	3	0	0		Crawling	23	0	0	0
Total larvae	22	22	22	22		Total larvae	30	30	30	30		Total larvae	26	26	26	26		Total larvae	30	30	30	30
