# Supplementary material for: Nociceptive interneurons control modular motor pathways to promote escape behavior in Drosophila
Source: eLife. 2018 Mar 12;7:e26016. doi: 10.7554/eLife.26016 (PMC5869015; doi:10.7554/eLife.26016)
Supplement: Figure 3—source data 1. [file elife-26016-fig3-data1.xlsx]

## Sheet: Sheet1
Figure 3C
	Genotype	n #	Median ∆F/F0	25% Percentile	75% Percentile	Statistical Test	P-Value
						Kruskal-Wallis with Dunn's Correction; Post-hoc paired T-test	<0.0001	Comparing ∆F/F0 between noxious condition and pre-noxious stimulus
						Kruskal-Wallis with Dunn's Correction; Post-hoc Wilcoxon	0.001	Comparing ∆F/F0 between noxious condition and post-noxious stimulus
Pre	20X-UAS-IVS-GCaMP6m /+;412-Gal4	15	26.67	25.91	33.61
Noxious	20X-UAS-IVS-GCaMP6m /+;412-Gal4	15	136.3	83.58	142.8
Post	20X-UAS-IVS-GCaMP6m /+;412-Gal4	15	13.5	11.62	15.46
Figure 3F
	Genotype	n #	Median ∆F/F0	25% Percentile	75% Percentile	Statistical Test	P-Value
						Kruskal-Wallis with Dunn's Correction; Post-hoc T-test	<0.0001	Comparing ∆F/F0 between noxious condition with and without cIV activity
						Kruskal-Wallis with Dunn's Correction; Post-hoc Wilcoxon	0.002	Comparing ∆F/F0 between noxious condition and post-noxious condition
Pre (Control)	20X-UAS-IVS-GCaMP6m/+ ;412- Gal4 /+	12	19.12	17.26	21.27
Noxious (Control)	20X-UAS-IVS-GCaMP6m/+ ;412- Gal4 /+	12	113.9	79.23	142.9
Post (Control)	20X-UAS-IVS-GCaMP6m/+ ;412- Gal4 /+	12	13.5	12.42	18.38
Pre (cIV-silenced)	20X-UAS-IVS-GCaMP6m/R38A10-LexA; 412-Gal4 /13X-LexAop2-IVS- TNT::HA	11	16.19	15.16	16.92
Noxious (cIV-silenced)	20X-UAS-IVS-GCaMP6m/R38A10-LexA; 412-Gal4 /13X-LexAop2-IVS- TNT::HA	11	18.21	12.88	64.34
Post (cIV-silenced)	20X-UAS-IVS-GCaMP6m/R38A10-LexA; 412-Gal4 /13X-LexAop2-IVS- TNT::HA	11	14.21	8.519	18.43
Figure 3H
	Genotype	# larvae rolling	total larvae	Statistical Test	P-Value
				Chi-squared	<0.0001	Comparing rolling with and without R38A10-LexA (cIV) neural activity
R38A10- LexA/+	38A10- LexA/+	19	22
R38A10> 13X-AopTNT	R38A10-LexA/+;13XLexAop2 -IVS-TNT::HA /+	2	30
Figure 3I
	Genotype	# larvae rolling	total larvae	Statistical Test	P-Value
				Chi-squared	0.0056	Comparing rolling with 412>dTrpA activation with and without R38A10-LexA (cIV) neural activity
412>UAS-dTrpA	UAS-dTrpA1/+; 412- Gal4/+	34	34
412>UAS-dTrpA R38A10>13XAopTNT	R38A10-LexA/UAS-dTrpA1; 412-Gal4/13X-LexAop2-IVS-TNT::HA	28	34
