# Supplementary material for: Nociceptive interneurons control modular motor pathways to promote escape behavior in Drosophila
Source: eLife. 2018 Mar 12;7:e26016. doi: 10.7554/eLife.26016 (PMC5869015; doi:10.7554/eLife.26016)
Supplement: Figure 4—figure supplement 1—source data 1. [file elife-26016-fig4-figsupp1-data1.xlsx]

## Sheet: Sheet1
Figure 4_Supp1C
	Genotype	n #	Median Rolling Latency (Seconds)	25% Percentile	75% Percentile	Statistical Test	P-Value
						Unpaired T-Test	ns, 0.2397	Comparing R70F01Ç412 with non-silenced group
R70F01-LexA/8X- Aop2FLPL; 412-Gal4/UAS>Stop>Kir2.1-GFP (GFP-)	R70F01-LexA/8X- Aop2FLPL; 412-Gal4/UAS>Stop>Kir2.1-GFP	20	3.5	3	4.75
R70F01-LexA/8X- Aop2FLPL; 412-Gal4/UAS>Stop>Kir2.1-GFP (GFP+)	R70F01-LexA/8X- Aop2FLPL; 412-Gal4/UAS>Stop>Kir2.1-GFP	15	3	2	4
Figure 4_Supp1D
	Genotype	n #	Median #ofrolls	25% Percentile	75% Percentile
R38H01-Gal4/+	R38H01-Gal4/+	28	3.5	0.25	5
R38H01> UAS-Kir2.1	R38H01-Gal4/ UAS-Kir2.1-eGFP	32	3	1.25	6
Figure 4_Supp1E
	Genotype	n #	% Time Bend-Crawling (Median, 25%, 75%)	%Time Rolling (Median, 25%, 75%)	%Time Bending Only (Median, 25%, 75%)	Statistical Test	P-Value
						Kruskal-Wallis with Dunn's Correction; Post-hoc Mann-Whitney	<0.0001	Comparing %Time rolling in R70F01Ç412 with non-silenced group
Non-Silenced	R70F01-LexA/8X- Aop2FLPL; 412-Gal4/UAS>Stop>Kir2.1-GFP	74	0,0,11.67	16.67, 6.667,23.33	0,0,6.667
R70F01Ç412	R70F01-LexA/8X- Aop2FLPL; 412-Gal4/UAS>Stop>Kir2.1-GFP	39	13.33, 0, 43.33	0,0, 6.667	0,0,6.667
Figure 4_Supp1F
	Bend->Non roller	Bend->Roller	No Bend	Total larvae
Non-Silenced	10	63	1	74
R70F01Ç412	19	15	5	39
Figure 4_Supp1G
	Genotype	n #	Median Crawling speed (mm/s)	25% Percentile	75% Percentile	Statistical Test	P-Value
						Mann-Whitney	0.0018	Comparing crawling speed with 412-Gal4 neurons silenced (TNT) with the inactivated TNT control (TNTi)
412>UAS-TNTi	UAS-TNTi/+; 412-Gal4/+	30	0.7424	0.6291	0.8581
412>UAS-TNT	UAS-TNT/+; 412-Gal4/+	30	0.9149	0.7586	1.099
Figure 4_Supp1H
	Genotype	n #	Median Kernan Score	25% Percentile	75% Percentile
412>UAS-TNTi	UAS-TNTi/+; 412-Gal4/+	38	8	7	8
412>UAS-TNT	UAS-TNT/+; 412-Gal4/+	41	7	5	9
