# Supplementary material for: Nociceptive interneurons control modular motor pathways to promote escape behavior in Drosophila
Source: eLife. 2018 Mar 12;7:e26016. doi: 10.7554/eLife.26016 (PMC5869015; doi:10.7554/eLife.26016)
Supplement: Figure 4—source data 1. [file elife-26016-fig4-data1.xlsx]

## Sheet: Sheet1
Figure 4C
	Genotype	n #	Median #ofrolls	25% Percentile	75% Percentile	Statistical Test	P-Value
						Kruskal-Wallis with Dunn's Correction; Post-hoc T-test or Mann-Whitney	<0.0001	Comparing R70F01Ç412 with non-silenced and LexAop+UAS constructs alone
8X-Aop2FLPL/+; 10X-UAS>Stop>Kir2.1-GFP/+	8X-Aop2FLPL/+; 10X-UAS>Stop>Kir2.1-GFP/+	35	3	1	4
R70F01-LexA/8X- Aop2FLPL; 412-Gal4/UAS>Stop>Kir2.1-GFP (GFP-)	R70F01-LexA/8X- Aop2FLPL; 412-Gal4/UAS>Stop>Kir2.1-GFP	74	3	1	6
R70F01-LexA/8X- Aop2FLPL; 412-Gal4/UAS>Stop>Kir2.1-GFP (GFP+)	R70F01-LexA/8X- Aop2FLPL; 412-Gal4/UAS>Stop>Kir2.1-GFP	40	0	0	1
Figure 4D
	Genotype	n #	Median Rolling Duration (seconds)	25% Percentile	75% Percentile	Statistical Test	P-Value
						Mann-Whitney	0.0007	Comparing R70F01Ç412 with non-silenced group
R70F01-LexA/8X- Aop2FLPL; 412-Gal4/UAS>Stop>Kir2.1-GFP (GFP-)	R70F01-LexA/8X- Aop2FLPL; 412-Gal4/UAS>Stop>Kir2.1-GFP	20	0.75	0.6042	0.9042
R70F01-LexA/8X- Aop2FLPL; 412-Gal4/UAS>Stop>Kir2.1-GFP (GFP+)	R70F01-LexA/8X- Aop2FLPL; 412-Gal4/UAS>Stop>Kir2.1-GFP	15	1.1	0.95	1.767
Figure 4I
	Genotype	n #	Median %ofboundarypoints	25% Percentile	75% Percentile	Statistical Test	P-Value
						MANOVA; posthoc T-test	Low curvature: 0.0013; High curvature: 0.0009	Comparing R70F01Ç412 with non-silenced group during low or high curvature
Non-Silenced (Low Curvature)	R70F01-LexA/8X- Aop2FLPL; 412-Gal4/UAS>Stop>Kir2.1-GFP	24	8.372	7.275	10.17
R70F01Ç412 (Low Curvature)	R70F01-LexA/8X- Aop2FLPL; 412-Gal4/UAS>Stop>Kir2.1-GFP	25	11.36	9.826	13.13
Non-Silenced (High Curvature)	R70F01-LexA/8X- Aop2FLPL; 412-Gal4/UAS>Stop>Kir2.1-GFP	24	8.882	7.179	10.26
R70F01Ç412 (High Curvature)	R70F01-LexA/8X- Aop2FLPL; 412-Gal4/UAS>Stop>Kir2.1-GFP	25	5.259	2.107	8.389
