# Supplementary material for: Nociceptive interneurons control modular motor pathways to promote escape behavior in Drosophila
Source: eLife. 2018 Mar 12;7:e26016. doi: 10.7554/eLife.26016 (PMC5869015; doi:10.7554/eLife.26016)
Supplement: Figure 5—source data 1. [file elife-26016-fig5-data1.xlsx]

## Sheet: Sheet1
Figure 5C	%Total input
	cIV	cIII	cII	es	Other sensory	Other neurons
DnB a1r	46.37	14.11	3.23	4.03	4.44	27.82
DnB a1l	47.67	15.54	2.07	5.18	5.7	23.83
