# Supplementary material for: Nociceptive interneurons control modular motor pathways to promote escape behavior in Drosophila
Source: eLife. 2018 Mar 12;7:e26016. doi: 10.7554/eLife.26016 (PMC5869015; doi:10.7554/eLife.26016)
Supplement: Figure 6—source data 1. [file elife-26016-fig6-data1.xlsx]

## Sheet: Sheet1
Figure 6B	%Top Hit Output
	Premotor	Motor	Noci integrator
DnB a1r	70	3	27
DnB a1l	67	9	24
