# Supplementary material for: Nociceptive interneurons control modular motor pathways to promote escape behavior in Drosophila
Source: eLife. 2018 Mar 12;7:e26016. doi: 10.7554/eLife.26016 (PMC5869015; doi:10.7554/eLife.26016)
Supplement: Figure 7—figure supplement 1—source data 1. [file elife-26016-fig7-figsupp1-data1.xlsx]

## Sheet: Sheet1
Figure 7_Supp1B	Genotype	n #	Median #rolls	25% Percentile	75% Percentile	Statistical Test	P-Value
						Mann-Whitney	0.0027	Comparing rolling with and without Per-Gal4 activity
PerGal4/+	PerGal4/+	30	4	0	7
Per>UAS-Kir2.1	PerGal4/+; UAS-Kir2.1-eGFP	34	0	0	2
Figure 7_Supp1C
	Genotype	n #	% Time Bend-Crawling (Median, 25%, 75%)	%Time Rolling (Median, 25%, 75%)	%Time Bending Only (Median, 25%, 75%)
Control	PerGal4/+	30	0,0,6.667	11.67,0,20	0,0,0
PMSI Silenced	PerGal4/+; UAS-Kir2.1-eGFP	34	0,0,6.667	0,0,13.33	0,0,13.33
Figure 7_Supp1D
	Genoype	Bend-> Non roller	Bend->Roller	No Bend	Total larvae
PerGal4/+	PerGal4/+	8	19	3	30
Per>UAS-Kir2.1	PerGal4/+; UAS-Kir2.1-eGFP	12	15	7	34
