# Supplementary material for: Nociceptive interneurons control modular motor pathways to promote escape behavior in Drosophila
Source: eLife. 2018 Mar 12;7:e26016. doi: 10.7554/eLife.26016 (PMC5869015; doi:10.7554/eLife.26016)
Supplement: Figure 7—source data 1. — Genotypes and maximum ∆F/F0 per animal tested during Goro imaging experiments. Genotypes, number of animals tested, graph data and statistical testing presented for 412-Gal4+Goro-experiments. [file elife-26016-fig7-data1.xlsx]

## Sheet: Sheet1
Figure 7C
CNS activation	Genotype	Max Goro ∆F/F0/animal
	R69E06-LexAp65/+;20xUAS-CsChrimson-mCherry, 13xLexAop2-IVS-GCaMP6s- p10/412-Gal4	78.8667
		298.192
		181.355
		99.5411
		381.096
		344.221
Figure 7D
Brain activation	Genotype	Max Goro ∆F/F0/animal
	R69E06-LexAp65/+;20xUAS-CsChrimson-mCherry, 13xLexAop2-IVS-GCaMP6s- p10/412-Gal4	11.6329
		23.2884
		18.6692
		26.9808
Figure 7E
VNC 1-2 segment activation	Genotype	Max Goro ∆F/F0/animal
	R69E06-LexAp65/+;20xUAS-CsChrimson-mCherry, 13xLexAop2-IVS-GCaMP6s- p10/412-Gal4	29.1908
		107.017
		43.3634
		29.9604
		73.9172
		50.3577
		190.564
Figure 7G
	Genotype	Bend->Non roller	Bend->Roller	Total larvae
412-Gal4+	LexAop-Kir2.1/+;412-Gal4/UAS-dTrpA	16	25	41
412-Gal4+ Goro-	LexAop- Kir2.1/16e11-LexA; 412-Gal4/UAS-dTrpA	45	6	51
Figure 7H
	Genotype	n #	Mean Total #rolls	Standard deviation	Statistical Test	P-Value
					Mann-Whitney	<0.0001	Comparing 412-Gal4 activation with and without Goro activity
412-Gal4+	LexAop-Kir2.1/+;412 -Gal4/UAS-dTrpA	41	2.61	3.105
412-Gal4+ Goro-	LexAop- Kir2.1/16e11-LexA; 412-Gal4/UAS-dTrpA	51	0.1765	0.6231
