# Supplementary material for: Nociceptive interneurons control modular motor pathways to promote escape behavior in Drosophila
Source: eLife journal article supplement (doi:10.7554/elife.26016), 2018-03-12
Supplement: supp [file elife_poa_e26016_Supplementary_File_2.xlsx]

## Sheet: Sheet1
Figure	Statistical Test	P-Value
1G	Chi-squared with Bonferonni Correction in cases of multiple testing	<0.0001
1J	One-way ANOVA with Tukey's multiple comparisons test; post-hoc T-test	<0.0001
1L	Kruskal-Wallis with Dunn's Correction	<0.0001
1M	Mann-Whitney	<0.0001
3C,F	Kruskal-Wallis with Dunn's Correction;Post-hoc T-test or Mann-Whitney	<0.0001
3H	Chi-squared	<0.0001
3I	Chi-squared	0.0056
4C	Kruskal-Wallis with Dunn's Correction;Post-hoc Mann-Whitney	<0.0001
4D	Mann-Whitney	0.0007
4I	MANOVA; posthoc T-test	Low curvature: 0.0013; High curvature: 0.0009
7H	Mann-Whitney	<0.0001
1_Supp4B-D	Chi-squared with Bonferonni Correction in cases of multiple testing	<0.0001
4_Supp1E	Kruskal-Wallis with Dunn's Correction;Post-hoc Mann-Whitney	<0.0001
4_Supp1G	Mann-Whitney	0.0018
7_Supp1B	Mann-Whitney	0.0027
