# Supplementary figures and images for: Nociceptive interneurons control modular motor pathways to promote escape behavior in Drosophila
Source: eLife journal article supplement (doi:10.7554/elife.26016), 2018-03-12

4051-Gal4

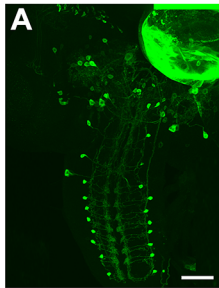

4051-Gal4 412-Qf

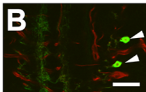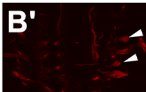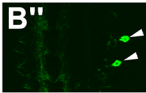

4051-Gal4

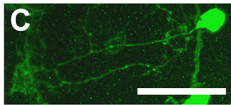

Supplement: supp [file elife_poa_e26016_Figure_1_figure_supplement_1.pdf › elife_poa_e26016_Figure_1_figure_supplement_1.pdf]

Class IV 412-Gal4

ddaC

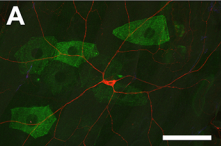

412-Gal4

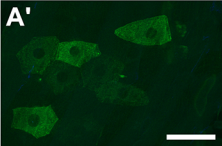

412-Gal4

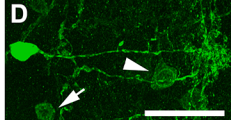

v'ada

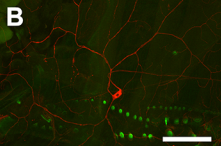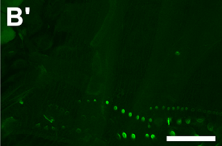

A26e

5HT

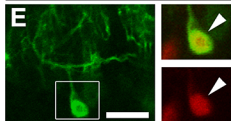

vdaB

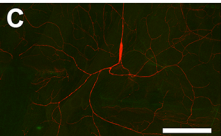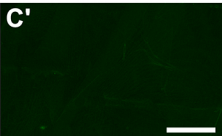

A27j

GABA

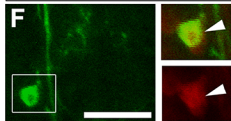

Supplement: supp [file elife_poa_e26016_Figure_1_figure_supplement_2.pdf › elife_poa_e26016_Figure_1_figure_supplement_2.pdf]

polarity analysis

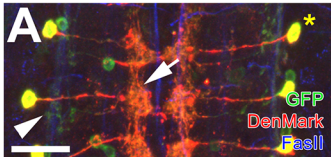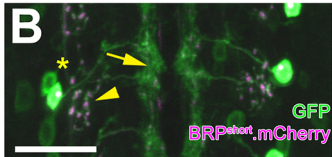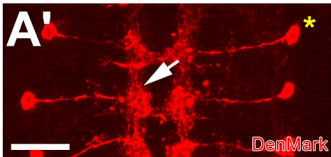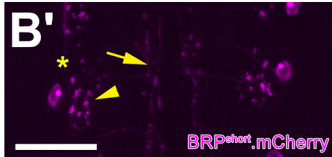

Supplement: supp [file elife_poa_e26016_Figure_1_figure_supplement_3.pdf › elife_poa_e26016_Figure_1_figure_supplement_3.pdf]

**A**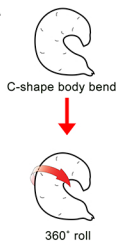**B**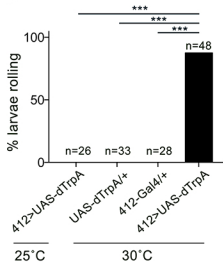**C**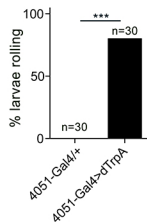**D**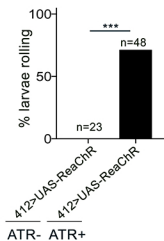

Trh-Gal4

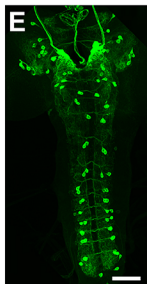

R38H01-Gal4

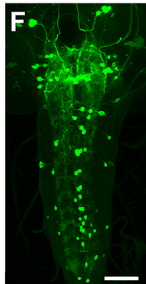**G**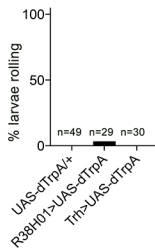

Supplement: supp [file elife_poa_e26016_Figure_1_figure_supplement_4.pdf › elife_poa_e26016_Figure_1_figure_supplement_4.pdf]

**A****A1 right**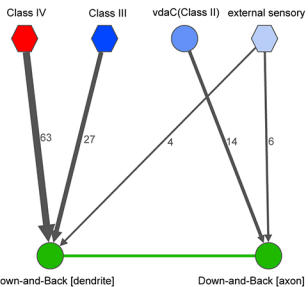**A1 left**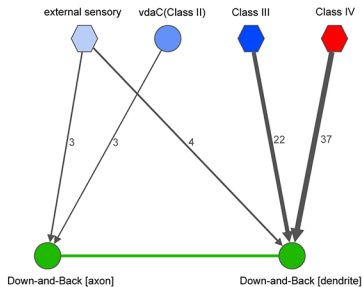

class III class IV

412-Gal4 class IV FasII

412-Gal4 class IV

class III 412-Gal4

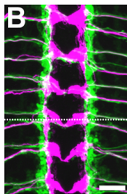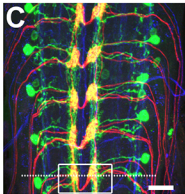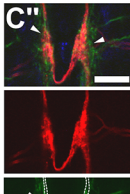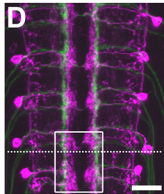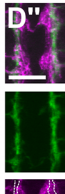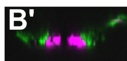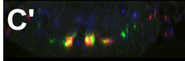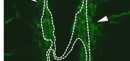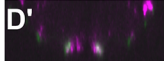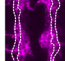

Supplement: supp [file elife_poa_e26016_Figure_5_figure_supplement_1.pdf › elife_poa_e26016_Figure_5_figure_supplement_1.pdf]

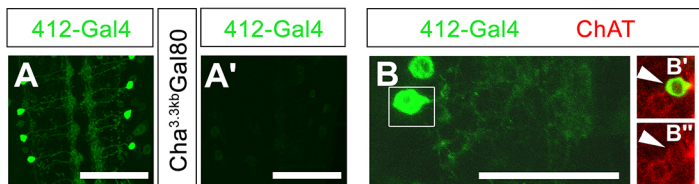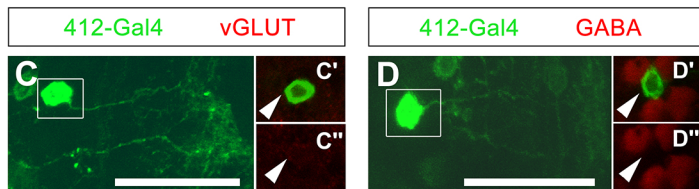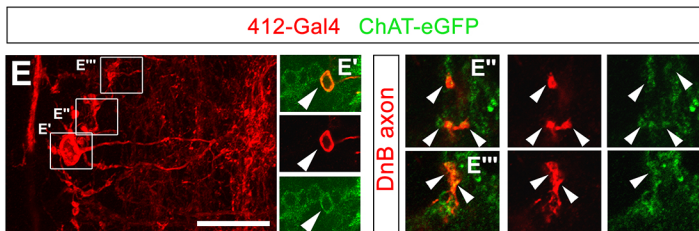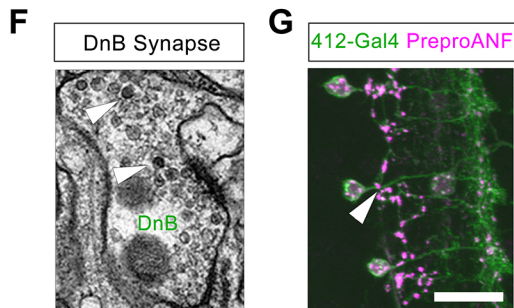

Supplement: supp [file elife_poa_e26016_Figure_6_figure_supplement_1.pdf › elife_poa_e26016_Figure_6_figure_supplement_1.pdf]

# Per-Gal4

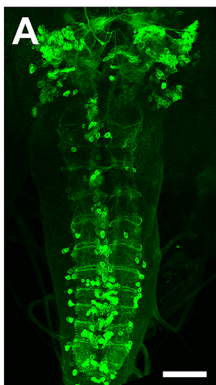

**B**

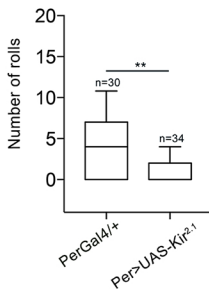

**C**

Control: Per-Gal4/+  
PMSI silenced: Per>UAS-Kir2.1

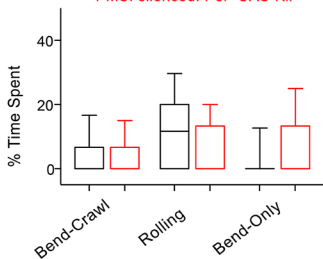

**D**

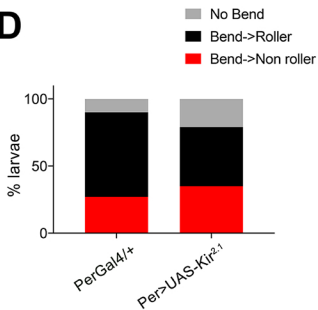

Supplement: supp [file elife_poa_e26016_Figure_7_figure_supplement_1.pdf › elife_poa_e26016_Figure_7_figure_supplement_1.pdf]
